# Supplementary material for: Determination of multi pesticide residues in leaf and needle samples using a modified QuEChERS approach and gas chromatography-tandem mass spectrometry
Source: Royal Society of Chemistry journal article supplement (doi:10.1039/d0ay02329a), 2021-01-01
Supplement: d0ay02329a1.pdf [file d0ay02329a1.pdf]

**Supplementary Table 1.** Pesticide classification, retention time (RT), dynamic multiple reaction monitoring (dMRM) transitions and collision energy (CE) of analyzed target compounds. Quantifier transitions are marked in bold.

| Name                 | Pesticide classification   | RT [min] | dMRM Transitions            | CE [eV] | Name                          | Pesticide classification | RT [min] | dMRM Transitions            | CE [eV] |
|----------------------|----------------------------|----------|-----------------------------|---------|-------------------------------|--------------------------|----------|-----------------------------|---------|
| 2,4-D-ethyl ester    | Herbicide                  | 7.49     | <b>247.9</b> → <b>185.0</b> | 10      | Ametoctradin                  | Fungicide                | 15.20    | 275.0 → 246.2               | 0       |
|                      |                            |          | 185.0 → 114.9               | 25      |                               |                          |          | 275.0 → 190.3               | 15      |
|                      |                            |          | 175.0 → 111.0               | 10      |                               |                          |          | <b>246.0</b> → <b>188.2</b> | 25      |
| 2-Phenylphenol       | Microbiocide               | 6.25     | 169.1 → 91.0                | 35      | Amisulbrom                    | Fungicide                | 16.14    | 227.9 → 147.0               | 15      |
|                      |                            |          | <b>141.1</b> → <b>63.0</b>  | 45      |                               |                          |          | <b>225.9</b> → <b>147.0</b> | 15      |
|                      |                            |          | 115.1 → 65.0                | 25      |                               |                          |          | 214.0 → 160.0               | 20      |
| 8-Hydroxyquinoline   | Fungicide,<br>Microbiocide | 5.38     | 145.0 → 63.0                | 40      | Azoxystrobin                  | Fungicide                | 18.30    | 344.1 → 182.9               | 25      |
|                      |                            |          | 117.0 → 63.0                | 40      |                               |                          |          | <b>344.1</b> → <b>171.9</b> | 40      |
|                      |                            |          | <b>117.0</b> → <b>39.1</b>  | 40      |                               |                          |          | 344.1 → 155.8               | 40      |
| Acequinocyl          | Insecticide                | 16.77    | 342.9 → 188.8               | 20      | Beflubutamid                  | Herbicide                | 10.67    | 192.9 → 145.1               | 15      |
|                      |                            |          | <b>341.9</b> → <b>187.9</b> | 15      |                               |                          |          | 192.9 → 95.0                | 35      |
|                      |                            |          | 187.9 → 131.0               | 20      |                               |                          |          | <b>176.1</b> → <b>79.1</b>  | 25      |
| Acetamiprid          | Insecticide                | 13.85    | 221.0 → 56.1                | 15      | Benalaxyl                     | Fungicide                | 12.87    | 266.0 → 148.1               | 5       |
|                      |                            |          | 126.0 → 90.0                | 5       |                               |                          |          | <b>233.9</b> → <b>146.0</b> | 20      |
|                      |                            |          | <b>126.0</b> → <b>72.9</b>  | 20      |                               |                          |          | 206.0 → 162.1               | 5       |
| Acibenzolar-S-methyl | Fungicide                  | 9.30     | 182.0 → 167.1               | 10      | Bentazone                     | Herbicide                | 10.11    | <b>225.0</b> → <b>181.9</b> | 5       |
|                      |                            |          | 182.0 → 153.1               | 10      |                               |                          |          | 198.0 → 92.0                | 30      |
|                      |                            |          | <b>182.0</b> → <b>135.0</b> | 15      |                               |                          |          | 182.0 → 90.0                | 15      |
| Aclonifen            | Herbicide                  | 12.39    | 264.1 → 194.2               | 15      | Benthiavalicarb-<br>isopropyl | Fungicide                | 14.57    | 222.0 → 125.9               | 40      |
|                      |                            |          | <b>194.1</b> → <b>167.1</b> | 20      |                               |                          |          | <b>180.0</b> → <b>127.0</b> | 20      |
|                      |                            |          | 194.1 → 139.1               | 25      |                               |                          |          | 180.0 → 83.0                | 30      |
| Acrinathrin          | Insecticide                | 15.02    | <b>288.9</b> → <b>92.8</b>  | 10      | Bifenazate                    | Insecticide              | 13.94    | 258.0 → 170.1               | 20      |
|                      |                            |          | 207.8 → 152.0               | 35      |                               |                          |          | <b>199.0</b> → <b>77.0</b>  | 40      |
|                      |                            |          | 181.0 → 127.0               | 30      |                               |                          |          | 196.0 → 115.1               | 5       |
| Aldrin               | Insecticide                | 9.94     | <b>262.9</b> → <b>192.9</b> | 35      | Bifenox                       | Herbicide                | 14.21    | 340.9 → 309.9               | 10      |
|                      |                            |          | 262.9 → 190.9               | 35      |                               |                          |          | <b>340.9</b> → <b>280.9</b> | 15      |
|                      |                            |          | 254.9 → 220.0               | 20      |                               |                          |          | 189.1 → 126.0               | 20      |

| Name                         | Pesticide classification | RT [min] | dMRM Transitions     | CE [eV] |
|------------------------------|--------------------------|----------|----------------------|---------|
| Bifenthrin                   | Insecticide              | 13.83    | <b>181.0 → 115.1</b> | 45      |
|                              |                          |          | 166.0 → 139.1        | 35      |
|                              |                          |          | 166.0 → 115.1        | 35      |
| Boscalid                     | Fungicide                | 16.50    | 140.0 → 112.0        | 10      |
|                              |                          |          | <b>140.0 → 76.0</b>  | 25      |
|                              |                          |          | 111.9 → 76.0         | 15      |
| Bromoxynil                   | Herbicide                | 7.41     | 276.8 → 88.0         | 30      |
|                              |                          |          | <b>274.7 → 167.9</b> | 15      |
|                              |                          |          | 274.7 → 88.0         | 30      |
| Bromuconazole<br>(2 isomers) | Fungicide                | 13.85    | 295.0 → 172.9        | 10      |
|                              |                          | 14.29    | <b>293.0 → 172.9</b> | 10      |
|                              |                          |          | 173.0 → 109.0        | 30      |
| Bupirimate                   | Fungicide                | 11.80    | <b>315.8 → 207.9</b> | 10      |
|                              |                          |          | 208.0 → 68.9         | 30      |
|                              |                          |          | 193.0 → 109.0        | 15      |
| Buprofezin                   | Insecticide              | 11.74    | <b>304.9 → 175.0</b> | 10      |
|                              |                          |          | 249.1 → 193.0        | 10      |
|                              |                          |          | 171.1 → 115.0        | 10      |
| Captan                       | Fungicide                | 10.73    | <b>263.8 → 79.0</b>  | 15      |
|                              |                          |          | 149.0 → 70.0         | 15      |
|                              |                          |          | 116.9 → 82.0         | 30      |
| Carbetamide                  | Herbicide                | 9.95     | 120.1 → 77.0         | 25      |
|                              |                          |          | <b>119.1 → 64.1</b>  | 15      |
|                              |                          |          | 91.0 → 64.1          | 10      |
| Carboxin                     | Fungicide                | 11.75    | <b>234.9 → 143.0</b> | 10      |
|                              |                          |          | 234.9 → 87.0         | 20      |
|                              |                          |          | 131.9 → 77.0         | 20      |

| Name                     | Pesticide classification          | RT [min] | dMRM Transitions     | CE [eV] |
|--------------------------|-----------------------------------|----------|----------------------|---------|
| Carfentrazone-ethyl      | Herbicide                         | 12.81    | <b>339.9 → 311.9</b> | 10      |
|                          |                                   |          | 329.9 → 309.9        | 10      |
|                          |                                   |          | 311.9 → 150.8        | 20      |
| <i>cis</i> -Chlordane    | Insecticide                       | 11.20    | 374.8 → 265.8        | 15      |
|                          |                                   |          | <b>372.8 → 265.8</b> | 15      |
|                          |                                   |          | 271.7 → 236.9        | 15      |
| <i>trans</i> -Chlordane  | Insecticide                       | 10.94    | 374.8 → 265.8        | 15      |
|                          |                                   |          | <b>372.8 → 265.8</b> | 15      |
|                          |                                   |          | 271.7 → 236.9        | 15      |
| Chloridazon<br>(Pyrazon) | Herbicide                         | 13.04    | 221.0 → 220.2        | 5       |
|                          |                                   |          | <b>220.0 → 193.1</b> | 20      |
|                          |                                   |          | 220.0 → 166.0        | 25      |
| Chlorothalonil           | Fungicide                         | 8.54     | 265.9 → 230.9        | 20      |
|                          |                                   |          | <b>265.9 → 133.0</b> | 45      |
|                          |                                   |          | 265.9 → 109.0        | 45      |
| Chlorotoluron            | Herbicide                         | 9.70     | <b>212.1 → 166.0</b> | 10      |
|                          |                                   |          | 212.1 → 72.0         | 15      |
|                          |                                   |          | 167.0 → 132.1        | 15      |
| Chlorpropham             | Herbicide, Plant growth regulator | 7.11     | <b>213.0 → 171.1</b> | 5       |
|                          |                                   |          | 171.0 → 127.1        | 5       |
|                          |                                   |          | 153.0 → 90.0         | 25      |
| Chlorpyrifos             | Insecticide                       | 9.86     | 313.8 → 257.8        | 15      |
|                          |                                   |          | <b>196.9 → 107.0</b> | 40      |
|                          |                                   |          | 196.9 → 98.0         | 30      |
| Chlorpyrifos-methyl      | Insecticide                       | 9.14     | 287.9 → 92.9         | 20      |
|                          |                                   |          | <b>285.9 → 93.0</b>  | 25      |
|                          |                                   |          | 124.9 → 47.0         | 15      |

| Name                                                 | Pesticide classification | RT [min] | dMRM Transitions     | CE [eV] |
|------------------------------------------------------|--------------------------|----------|----------------------|---------|
| Clodinafop-propargyl                                 | Plant growth regulator   | 12.97    | 348.9 → 265.9        | 10      |
|                                                      |                          |          | <b>348.9 → 237.8</b> | 15      |
|                                                      |                          |          | 238.0 → 130.0        | 15      |
| Clomazone                                            | Herbicide                | 7.98     | <b>205.1 → 107.1</b> | 20      |
|                                                      |                          |          | 127.0 → 101.0        | 20      |
|                                                      |                          |          | 125.0 → 89.0         | 15      |
| Cloquintocet-mexyl                                   | Herbicide safener        | 14.00    | 220.0 → 191.9        | 10      |
|                                                      |                          |          | <b>163.0 → 128.0</b> | 15      |
|                                                      |                          |          | 163.0 → 101.0        | 30      |
| Cyflufenamid                                         | Fungicide                | 11.88    | 188.1 → 88.0         | 35      |
|                                                      |                          |          | <b>118.1 → 90.0</b>  | 10      |
|                                                      |                          |          | 118.1 → 89.0         | 25      |
| Cyfluthrin (3 isomers)                               | Insecticide              | 16.17    | 206.0 → 176.9        | 25      |
|                                                      |                          | 16.25    | 206.0 → 150.0        | 40      |
|                                                      |                          | 16.37    | <b>162.9 → 127.0</b> | 5       |
| Cyhalofop-butyl                                      | Herbicide                | 14.68    | <b>357.1 → 229.1</b> | 15      |
|                                                      |                          |          | 256.2 → 120.1        | 10      |
|                                                      |                          |          | 229.2 → 109.1        | 15      |
| Cyhalothrin ( <i>gamma</i> and <i>lambda</i> isomer) | Insecticide              | 14.79    | <b>208.0 → 181.0</b> | 5       |
|                                                      |                          | 14.60    | 208.0 → 152.0        | 25      |
|                                                      |                          |          | 197.0 → 161.1        | 5       |
| Cypermethrin (3 isomers)                             | Insecticide              | 16.39    | 165.0 → 127.1        | 0       |
|                                                      |                          | 16.48    | 165.0 → 91.1         | 10      |
|                                                      |                          | 16.57    | <b>162.9 → 127.0</b> | 0       |
| Cyproconazole                                        | Fungicide                | 11.99    | <b>222.0 → 124.9</b> | 25      |
|                                                      |                          |          | 138.9 → 111.0        | 15      |
|                                                      |                          |          | 138.9 → 75.0         | 35      |

| Name             | Pesticide classification | RT [min] | dMRM Transitions     | CE [eV] |
|------------------|--------------------------|----------|----------------------|---------|
| Cyprodinil       | Fungicide                | 10.39    | 225.2 → 224.3        | 10      |
|                  |                          |          | <b>224.2 → 131.1</b> | 15      |
|                  |                          |          | 210.0 → 93.0         | 20      |
| Cyromazine       | Insecticide              | 7.97     | <b>165.9 → 109.0</b> | 20      |
|                  |                          |          | 151.0 → 82.0         | 30      |
|                  |                          |          | 109.0 → 68.0         | 20      |
| <i>o,p'</i> -DDD | Insecticide, Metabolite  | 11.78    | 235.0 → 200.1        | 10      |
|                  |                          |          | 235.0 → 139.1        | 45      |
|                  |                          |          | <b>199.1 → 164.1</b> | 20      |
| <i>p,p'</i> -DDD | Insecticide, Metabolite  | 12.36    | 237.0 → 200.1        | 15      |
|                  |                          |          | <b>199.1 → 164.1</b> | 20      |
|                  |                          |          | 165.1 → 139.0        | 35      |
| <i>o,p'</i> -DDE | Metabolite               | 10.98    | 317.8 → 248.0        | 15      |
|                  |                          |          | 248.0 → 176.2        | 30      |
|                  |                          |          | <b>246.0 → 176.2</b> | 30      |
| <i>p,p'</i> -DDE | Metabolite               | 11.52    | 317.8 → 246.0        | 15      |
|                  |                          |          | 315.8 → 246.0        | 15      |
|                  |                          |          | <b>246.1 → 176.2</b> | 30      |
| <i>o,p'</i> -DDT | Insecticide              | 12.27    | 237.0 → 199.1        | 15      |
|                  |                          |          | <b>235.0 → 199.1</b> | 15      |
|                  |                          |          | 199.0 → 163.1        | 35      |
| <i>p,p'</i> -DDT | Insecticide              | 12.94    | 237.0 → 165.2        | 20      |
|                  |                          |          | 235.0 → 199.2        | 15      |
|                  |                          |          | <b>235.0 → 165.2</b> | 20      |
| Deltamethrin     | Insecticide              | 18.02    | 252.9 → 174.0        | 0       |
|                  |                          |          | <b>252.9 → 93.1</b>  | 15      |
|                  |                          |          | 251.0 → 172.0        | 0       |

| Name                       | Pesticide classification | RT [min] | dMRM Transitions     | CE [eV] |
|----------------------------|--------------------------|----------|----------------------|---------|
| Desmedipham                | Herbicide                | 7.67     | <b>135.0 → 79.0</b>  | 10      |
|                            |                          |          | 122.0 → 94.0         | 25      |
|                            |                          |          | 122.0 → 65.0         | 10      |
| Diazinon                   | Insecticide              | 8.29     | 276.0 → 137.1        | 25      |
|                            |                          |          | <b>199.1 → 135.1</b> | 10      |
|                            |                          |          | 179.1 → 137.1        | 20      |
| Dicamba-methyl ester       | Herbicide                | 6.26     | 234.0 → 173.0        | 20      |
|                            |                          |          | <b>205.0 → 149.0</b> | 15      |
|                            |                          |          | 175.0 → 111.0        | 20      |
| Diclofop-methyl            | Herbicide                | 13.26    | 339.9 → 252.9        | 10      |
|                            |                          |          | <b>280.8 → 119.9</b> | 10      |
|                            |                          |          | 253.0 → 162.1        | 15      |
| Dieldrin                   | Insecticide              | 11.62    | <b>262.9 → 193.0</b> | 5       |
|                            |                          |          | 262.9 → 191.0        | 35      |
|                            |                          |          | 247.0 → 241.0        | 35      |
| Diethofencarb              | Fungicide                | 9.76     | 225.0 → 96.0         | 30      |
|                            |                          |          | <b>207.0 → 179.1</b> | 5       |
|                            |                          |          | 207.0 → 151.0        | 15      |
| Difenoconazole (2 isomers) | Fungicide                | 17.72    | 324.8 → 266.8        | 15      |
|                            |                          | 17.78    | <b>322.8 → 264.8</b> | 15      |
|                            |                          |          | 264.9 → 202.0        | 20      |
| Diflubenzuron              | Insecticide              | 5.00     | 141.0 → 113.0        | 25      |
|                            |                          |          | <b>141.0 → 63.0</b>  | 25      |
|                            |                          |          | 113.0 → 63.0         | 25      |
| Diflufenican               | Herbicide                | 13.29    | <b>393.9 → 265.9</b> | 10      |
|                            |                          |          | 266.0 → 246.1        | 15      |
|                            |                          |          | 218.0 → 140.1        | 20      |

| Name                     | Pesticide classification | RT [min] | dMRM Transitions     | CE [eV] |
|--------------------------|--------------------------|----------|----------------------|---------|
| Dimethachlor             | Herbicide                | 8.99     | 209.9 → 134.1        | 10      |
|                          |                          |          | <b>196.9 → 148.2</b> | 10      |
|                          |                          |          | 134.1 → 79.1         | 20      |
| Dimethenamide-P          | Herbicide                | 9.02     | 229.9 → 154.0        | 10      |
|                          |                          |          | <b>229.9 → 111.0</b> | 25      |
|                          |                          |          | 202.9 → 154.0        | 10      |
| Dimethoate               | Insecticide              | 7.79     | 227.7 → 87.0         | 5       |
|                          |                          |          | <b>157.0 → 93.0</b>  | 10      |
|                          |                          |          | <b>157.0 → 63.0</b>  | 25      |
| Dimethomorph (2 isomers) | Fungicide                | 18.35    | 302.9 → 164.9        | 10      |
|                          |                          | 18.66    | <b>300.9 → 165.0</b> | 10      |
|                          |                          |          | 300.9 → 138.8        | 15      |
| Dimoxystrobin            | Fungicide                | 13.85    | 237.0 → 116.0        | 15      |
|                          |                          |          | <b>205.0 → 116.0</b> | 10      |
|                          |                          |          | 174.0 → 115.0        | 30      |
| Diuron                   | Herbicide                | 10.66    | 231.7 → 71.8         | 15      |
|                          |                          |          | <b>186.9 → 124.0</b> | 20      |
|                          |                          |          | 158.9 → 123.9        | 10      |
| Dodemorph (2 isomers)    | Fungicide                | 10.24    | <b>281.0 → 154.0</b> | 10      |
|                          |                          | 10.55    | 238.1 → 55.1         | 20      |
|                          |                          |          | 154.0 → 112.1        | 10      |
| Epoxiconazole            | Fungicide                | 13.52    | <b>192.0 → 138.1</b> | 10      |
|                          |                          |          | 192.0 → 111.0        | 25      |
|                          |                          |          | 138.0 → 75.0         | 25      |
| Ethofenprox              | Insecticide              | 16.78    | 183.0 → 168.0        | 10      |
|                          |                          |          | 163.0 → 135.1        | 10      |
|                          |                          |          | <b>163.0 → 107.1</b> | 20      |

| Name          | Pesticide classification | RT [min] | dMRM Transitions     | CE [eV] |
|---------------|--------------------------|----------|----------------------|---------|
| Ethofumesate  | Herbicide                | 9.61     | 285.9 → 207.1        | 5       |
|               |                          |          | <b>178.9 → 137.1</b> | 0       |
|               |                          |          | 178.9 → 105.1        | 15      |
| Ethoprophos   | Insecticide              | 7.02     | 199.9 → 97.0         | 20      |
|               |                          |          | <b>157.9 → 97.0</b>  | 15      |
|               |                          |          | 157.9 → 81.0         | 15      |
| Etoxazole     | Insecticide              | 14.07    | 329.9 → 315.0        | 20      |
|               |                          |          | 299.9 → 284.9        | 10      |
|               |                          |          | <b>299.9 → 269.9</b> | 20      |
| Etridiazole   | Fungicide                | 5.85     | 211.1 → 183.0        | 10      |
|               |                          |          | 211.1 → 140.0        | 25      |
|               |                          |          | <b>185.0 → 142.0</b> | 15      |
| Famoxadone    | Fungicide                | 18.44    | 329.9 → 329.0        | 10      |
|               |                          |          | <b>329.9 → 223.9</b> | 10      |
|               |                          |          | 223.9 → 196.2        | 10      |
| Fenamiphos    | Insecticide              | 11.31    | 302.9 → 287.9        | 10      |
|               |                          |          | 302.9 → 153.9        | 15      |
|               |                          |          | <b>287.9 → 259.7</b> | 5       |
| Fenazaquin    | Insecticide              | 14.05    | 160.0 → 145.2        | 5       |
|               |                          |          | 146.0 → 118.1        | 10      |
|               |                          |          | <b>145.0 → 117.1</b> | 20      |
| Fenbuconazole | Fungicide                | 16.21    | 197.9 → 129.0        | 5       |
|               |                          |          | 197.9 → 102.0        | 30      |
|               |                          |          | <b>125.0 → 89.0</b>  | 20      |
| Fenhexamid    | Fungicide                | 12.97    | 301.0 → 97.0         | 15      |
|               |                          |          | 179.0 → 115.0        | 15      |
|               |                          |          | <b>177.1 → 113.0</b> | 15      |

| Name                    | Pesticide classification | RT [min]       | dMRM Transitions     | CE [eV] |
|-------------------------|--------------------------|----------------|----------------------|---------|
| Fenoxaprop-P-ethyl      | Herbicide                | 15.33          | 360.8 → 287.8        | 10      |
|                         |                          |                | <b>287.8 → 118.8</b> | 10      |
|                         |                          |                | 287.8 → 90.9         | 20      |
| Fenoxycarb              | Insecticide              | 13.86          | 256.1 → 187.2        | 10      |
|                         |                          |                | <b>186.2 → 109.0</b> | 15      |
|                         |                          |                | 186.2 → 77.1         | 20      |
| Fenpropidin             | Fungicide                | 9.45           | <b>273.0 → 98.0</b>  | 5       |
|                         |                          |                | 117.0 → 91.0         | 25      |
|                         |                          |                | 98.0 → 55.1          | 10      |
| Fenpropimorph           | Fungicide                | 9.81           | 128.1 → 110.1        | 5       |
|                         |                          |                | 128.1 → 86.1         | 10      |
|                         |                          |                | <b>128.1 → 70.1</b>  | 10      |
| Fenpyroximate           | Insecticide              | 7.85           | 212.0 → 185.0        | 40      |
|                         |                          |                | <b>212.0 → 76.9</b>  | 40      |
|                         |                          |                | 198.1 → 114.0        | 35      |
| Fenvalerate (2 isomers) | Insecticide              | 17.31<br>17.50 | 419.1 → 166.8        | 10      |
|                         |                          |                | <b>167.0 → 125.1</b> | 10      |
|                         |                          |                | 167.0 → 89.0         | 40      |
| Fipronil                | Insecticide              | 10.64          | <b>366.8 → 212.8</b> | 25      |
|                         |                          |                | 350.8 → 254.8        | 15      |
|                         |                          |                | 254.9 → 228.0        | 15      |
| Fipronil sulfide        | Metabolite               | 10.50          | 420.0 → 350.9        | 10      |
|                         |                          |                | <b>351.0 → 254.9</b> | 20      |
|                         |                          |                | 254.9 → 156.9        | 35      |
| Fipronil sulfone        | Metabolite               | 11.71          | 384.8 → 256.8        | 20      |
|                         |                          |                | <b>382.8 → 254.9</b> | 20      |
|                         |                          |                | 254.9 → 227.9        | 15      |

| Name              | Pesticide classification | RT [min] | dMRM Transitions     | CE [eV] |
|-------------------|--------------------------|----------|----------------------|---------|
| Fluazifop-P-butyl | Herbicide                | 11.97    | 382.9 → 282.0        | 10      |
|                   |                          |          | <b>281.9 → 238.0</b> | 15      |
|                   |                          |          | 281.9 → 91.0         | 15      |
| Fludioxonil       | Fungicide                | 11.51    | 248.0 → 182.1        | 10      |
|                   |                          |          | 248.0 → 154.1        | 20      |
|                   |                          |          | <b>248.0 → 127.1</b> | 30      |
| Flufenacet        | Herbicide                | 9.96     | 211.0 → 123.0        | 5       |
|                   |                          |          | <b>211.0 → 96.0</b>  | 15      |
|                   |                          |          | 183.0 → 69.0         | 20      |
| Flumetralin       | Herbicide                | 11.19    | 403.9 → 156.8        | 15      |
|                   |                          |          | 359.9 → 313.9        | 15      |
|                   |                          |          | <b>157.0 → 109.0</b> | 25      |
| Flumioxazin       | Herbicide                | 17.43    | 354.0 → 325.9        | 5       |
|                   |                          |          | 354.0 → 175.8        | 15      |
|                   |                          |          | <b>287.0 → 258.7</b> | 15      |
| Fluometuron       | Herbicide                | 6.98     | 232.0 → 72.0         | 15      |
|                   |                          |          | <b>213.0 → 167.9</b> | 10      |
|                   |                          |          | 187.0 → 109.0        | 20      |
| Fluopyram         | Fungicide                | 10.57    | 395.9 → 223.1        | 5       |
|                   |                          |          | <b>222.9 → 196.0</b> | 10      |
|                   |                          |          | 222.9 → 187.1        | 10      |
| Fluorochloridone  | Herbicide                | 10.11    | 311.0 → 174.1        | 15      |
|                   |                          |          | <b>311.0 → 102.9</b> | 15      |
|                   |                          |          | 187.1 → 109.1        | 20      |
| Flupyradifurone   | Insecticide              | 14.87    | 288.0 → 126.1        | 15      |
|                   |                          |          | 128.0 → 90.0         | 10      |
|                   |                          |          | <b>126.0 → 73.0</b>  | 25      |

| Name                                   | Pesticide classification | RT [min]       | dMRM Transitions     | CE [eV] |
|----------------------------------------|--------------------------|----------------|----------------------|---------|
| Fluquinconazole                        | Fungicide                | 15.85          | 342.0 → 107.8        | 40      |
|                                        |                          |                | <b>340.0 → 298.0</b> | 15      |
|                                        |                          |                | 340.0 → 107.8        | 40      |
| Fluroxypyr-meptyl                      | Herbicide                | 13.29          | 237.0 → 209.0        | 5       |
|                                        |                          |                | <b>237.0 → 181.0</b> | 15      |
|                                        |                          |                | 208.9 → 178.9        | 20      |
| Flurtamone                             | Herbicide                | 14.43          | <b>332.7 → 120.0</b> | 15      |
|                                        |                          |                | 157.0 → 137.1        | 15      |
|                                        |                          |                | 157.0 → 107.0        | 25      |
| Flutolanil                             | Herbicide                | 11.38          | 322.9 → 281.0        | 5       |
|                                        |                          |                | <b>280.9 → 173.0</b> | 10      |
|                                        |                          |                | 173.0 → 95.0         | 30      |
| Flutriafol                             | Fungicide                | 11.30          | <b>219.1 → 123.1</b> | 15      |
|                                        |                          |                | 219.1 → 95.0         | 35      |
|                                        |                          |                | 164.1 → 109.1        | 20      |
| <i>tau</i> -Fluvalinate<br>(2 isomers) | Insecticide              | 17.48<br>17.52 | 252.0 → 200.0        | 15      |
|                                        |                          |                | <b>250.0 → 200.1</b> | 15      |
|                                        |                          |                | 250.0 → 198.1        | 40      |
| Fluxapyroxad                           | Fungicide                | 14.57          | <b>321.1 → 152.9</b> | 35      |
|                                        |                          |                | 222.0 → 152.9        | 15      |
|                                        |                          |                | 222.0 → 125.9        | 40      |
| Fosthiazate<br>(2 isomers)             | Nematicide               | 10.27<br>10.31 | <b>199.0 → 102.0</b> | 5       |
|                                        |                          |                | 195.0 → 60.0         | 20      |
|                                        |                          |                | 165.9 → 106.0        | 10      |
| Fuberidazole                           | Fungicide                | 9.16           | 184.0 → 155.1        | 30      |
|                                        |                          |                | <b>156.0 → 103.1</b> | 20      |
|                                        |                          |                | 155.0 → 129.1        | 10      |

| Name                        | Pesticide classification | RT [min] | dMRM Transitions     | CE [eV] |
|-----------------------------|--------------------------|----------|----------------------|---------|
| Haloxfop-P-methyl           | Herbicide                | 10.93    | 375.1 → 316.0        | 10      |
|                             |                          |          | <b>375.1 → 91.1</b>  | 35      |
|                             |                          |          | 288.0 → 180.0        | 25      |
| <i>alpha</i> -HCH           | Insecticide              | 7.64     | 218.9 → 183.0        | 5       |
|                             |                          |          | <b>216.9 → 181.0</b> | 5       |
|                             |                          |          | 180.9 → 145.0        | 15      |
| <i>beta</i> -HCH            | Insecticide              | 7.99     | 218.9 → 183.1        | 5       |
|                             |                          |          | <b>216.9 → 181.1</b> | 5       |
|                             |                          |          | 181.0 → 145.0        | 15      |
| <i>gamma</i> -HCH (Lindane) | Insecticide              | 8.08     | 218.9 → 183.1        | 5       |
|                             |                          |          | <b>216.9 → 181.0</b> | 5       |
|                             |                          |          | 181.0 → 145.0        | 15      |
| <i>delta</i> -HCH           | Insecticide              | 8.51     | <b>217.0 → 181.1</b> | 5       |
|                             |                          |          | 183.1 → 147.1        | 15      |
|                             |                          |          | 181.1 → 145.1        | 15      |
| <i>epsilon</i> -HCH         | Insecticide              | 8.69     | 254.0 → 180.9        | 10      |
|                             |                          |          | 218.9 → 182.9        | 5       |
|                             |                          |          | <b>182.9 → 109.0</b> | 30      |
| Heptachlor                  | Insecticide              | 9.34     | 273.7 → 238.9        | 15      |
|                             |                          |          | 273.7 → 236.9        | 15      |
|                             |                          |          | <b>271.7 → 236.9</b> | 15      |
| Heptachlor endo-epoxide     | Metabolite               | 10.67    | 216.9 → 182.0        | 20      |
|                             |                          |          | 216.9 → 109.0        | 45      |
|                             |                          |          | <b>183.0 → 119.0</b> | 30      |
| Heptachlor exo-epoxide      | Metabolite               | 10.61    | <b>354.8 → 264.9</b> | 15      |
|                             |                          |          | 352.8 → 262.9        | 15      |
|                             |                          |          | 262.9 → 193.0        | 35      |

| Name                     | Pesticide classification | RT [min]       | dMRM Transitions     | CE [eV] |
|--------------------------|--------------------------|----------------|----------------------|---------|
| Hexachloro-benzene       | Fungicide                | 7.70           | <b>283.8 → 213.9</b> | 30      |
|                          |                          |                | 281.8 → 211.9        | 30      |
|                          |                          |                | 248.9 → 179.0        | 30      |
| Imazalil                 | Fungicide                | 11.48          | 216.8 → 175.0        | 5       |
|                          |                          |                | 174.9 → 147.0        | 15      |
|                          |                          |                | <b>172.9 → 109.0</b> | 30      |
| Imidacloprid             | Insecticide              | 11.31          | <b>211.0 → 113.0</b> | 15      |
|                          |                          |                | 126.0 → 89.9         | 5       |
|                          |                          |                | 126.0 → 73.0         | 25      |
| Indoxacarb               | Insecticide              | 18.02          | <b>264.0 → 175.8</b> | 15      |
|                          |                          |                | 202.9 → 134.0        | 20      |
|                          |                          |                | 202.9 → 106.0        | 15      |
| Ipconazole               | Fungicide                | 15.00          | 249.0 → 125.0        | 15      |
|                          |                          |                | 167.0 → 125.0        | 5       |
|                          |                          |                | <b>125.0 → 89.0</b>  | 20      |
| Iprovalicarb (2 isomers) | Fungicide                | 11.61<br>11.78 | 158.0 → 98.0         | 10      |
|                          |                          |                | <b>143.1 → 93.0</b>  | 15      |
|                          |                          |                | 116.0 → 98.1         | 5       |
| Isopyrazam               | Fungicide                | 15.30          | 359.0 → 159.0        | 40      |
|                          |                          |                | <b>302.1 → 262.1</b> | 15      |
|                          |                          |                | 159.0 → 139.0        | 10      |
| Isoxaben                 | Herbicide                | 15.17          | 165.0 → 150.0        | 15      |
|                          |                          |                | 165.0 → 107.0        | 25      |
|                          |                          |                | <b>149.9 → 121.9</b> | 5       |
| Kresoxim-methyl          | Fungicide                | 11.81          | 206.0 → 131.1        | 10      |
|                          |                          |                | <b>206.0 → 116.0</b> | 5       |
|                          |                          |                | 116.0 → 89.0         | 15      |

| Name              | Pesticide classification | RT [min] | dMRM Transitions     | CE [eV] |
|-------------------|--------------------------|----------|----------------------|---------|
| Lenacil           | Herbicide                | 12.95    | 233.9 → 153.1        | 5       |
|                   |                          |          | 153.1 → 110.1        | 20      |
|                   |                          |          | <b>153.1 → 82.1</b>  | 20      |
| Lufenuron         | Insecticide              | 5.58     | 251.6 → 157.8        | 15      |
|                   |                          |          | <b>202.9 → 75.9</b>  | 40      |
|                   |                          |          | 173.9 → 109.9        | 30      |
| Malathion         | Insecticide              | 9.73     | 172.9 → 117.0        | 15      |
|                   |                          |          | <b>172.9 → 99.0</b>  | 10      |
|                   |                          |          | 157.8 → 125.0        | 5       |
| MCPA-methyl ester | Herbicide                | 6.51     | 214.1 → 155.1        | 10      |
|                   |                          |          | 214.1 → 141.1        | 10      |
|                   |                          |          | <b>155.1 → 125.1</b> | 10      |
| MCPB-methyl ester | Herbicide                | 8.17     | 211.1 → 155.0        | 10      |
|                   |                          |          | 142.1 → 107.1        | 10      |
|                   |                          |          | <b>142.1 → 77.1</b>  | 30      |
| Mefenpyr-diethyl  | Herbicide safener        | 13.59    | <b>299.0 → 252.9</b> | 10      |
|                   |                          |          | 253.0 → 190.0        | 20      |
|                   |                          |          | 253.0 → 189.0        | 30      |
| Mepanipyrim       | Fungicide                | 11.16    | 222.2 → 158.1        | 25      |
|                   |                          |          | 221.2 → 220.2        | 15      |
|                   |                          |          | <b>207.1 → 179.1</b> | 25      |
| Metalaxyl         | Fungicide                | 9.33     | 234.0 → 146.1        | 20      |
|                   |                          |          | <b>220.0 → 160.1</b> | 10      |
|                   |                          |          | 206.1 → 162.1        | 5       |
| Metamitron        | Herbicide                | 11.83    | 202.1 → 186.1        | 10      |
|                   |                          |          | <b>104.1 → 51.0</b>  | 15      |
|                   |                          |          | 104.1 → 77.0         | 5       |

| Name                    | Pesticide classification | RT [min] | dMRM Transitions     | CE [eV] |
|-------------------------|--------------------------|----------|----------------------|---------|
| Metazachlor             | Herbicide                | 10.45    | 209.0 → 133.2        | 10      |
|                         |                          |          | <b>209.0 → 132.2</b> | 15      |
|                         |                          |          | 209.0 → 117.1        | 35      |
| Metconazole             | Fungicide                | 14.22    | 153.1 → 125.0        | 10      |
|                         |                          |          | 153.1 → 70.0         | 5       |
|                         |                          |          | <b>125.0 → 89.0</b>  | 20      |
| Methiocarb              | Insecticide              | 9.58     | 169.0 → 154.1        | 10      |
|                         |                          |          | 168.0 → 109.1        | 15      |
|                         |                          |          | <b>153.0 → 91.1</b>  | 20      |
| Metobromuron            | Herbicide                | 8.79     | 258.0 → 61.0         | 10      |
|                         |                          |          | <b>196.9 → 89.9</b>  | 25      |
|                         |                          |          | 169.9 → 142.9        | 20      |
| <i>(S)</i> -Metolachlor | Herbicide                | 9.89     | 238.0 → 162.2        | 10      |
|                         |                          |          | <b>238.0 → 133.2</b> | 30      |
|                         |                          |          | 162.1 → 133.2        | 15      |
| Metrafenone             | Fungicide                | 15.24    | <b>394.8 → 364.8</b> | 15      |
|                         |                          |          | 376.9 → 346.8        | 20      |
|                         |                          |          | 226.9 → 169.0        | 10      |
| Metribuzin              | Herbicide                | 9.00     | <b>198.0 → 82.0</b>  | 15      |
|                         |                          |          | 198.0 → 55.0         | 30      |
|                         |                          |          | 182.0 → 114.9        | 10      |
| Myclobutanil            | Fungicide                | 11.68    | <b>179.0 → 125.1</b> | 10      |
|                         |                          |          | 179.0 → 90.0         | 30      |
|                         |                          |          | 150.0 → 123.0        | 15      |
| Napropamide             | Herbicide                | 11.40    | <b>271.0 → 100.1</b> | 15      |
|                         |                          |          | 271.0 → 72.1         | 15      |
|                         |                          |          | 128.0 → 100.1        | 10      |



| Name             | Pesticide classification | RT [min] | dMRM Transitions     | CE [eV] |
|------------------|--------------------------|----------|----------------------|---------|
| Oryzalin         | Herbicide                | 15.51    | 316.8 → 274.9        | 5       |
|                  |                          |          | <b>275.0 → 217.0</b> | 5       |
|                  |                          |          | 258.0 → 193.9        | 5       |
| Oxadiazon        | Herbicide                | 11.63    | <b>301.8 → 175.0</b> | 15      |
|                  |                          |          | 257.8 → 112.0        | 30      |
|                  |                          |          | 174.9 → 112.0        | 15      |
| Oxamyl           | Insecticide, Nematicide  | 6.30     | 162.0 → 114.9        | 10      |
|                  |                          |          | 145.0 → 71.9         | 20      |
|                  |                          |          | <b>145.0 → 60.9</b>  | 10      |
| Oxychlorane      | Metabolite               | 10.53    | 386.7 → 262.7        | 15      |
|                  |                          |          | 236.9 → 142.9        | 25      |
|                  |                          |          | <b>184.9 → 121.0</b> | 15      |
| Oxyfluorfen      | Herbicide                | 11.71    | 299.9 → 222.8        | 15      |
|                  |                          |          | 252.0 → 196.0        | 20      |
|                  |                          |          | <b>252.0 → 146.0</b> | 30      |
| Paclobutrazol    | Plant growth regulator   | 11.09    | 236.0 → 167.1        | 10      |
|                  |                          |          | <b>167.1 → 132.1</b> | 10      |
|                  |                          |          | 125.1 → 89.0         | 20      |
| Parathion        | Insecticide              | 9.97     | <b>291.0 → 137.1</b> | 5       |
|                  |                          |          | 291.0 → 109.0        | 15      |
|                  |                          |          | 139.0 → 81.0         | 15      |
| Parathion-methyl | Insecticide, Nematicide  | 9.14     | 262.9 → 109.0        | 10      |
|                  |                          |          | 262.9 → 79.0         | 30      |
|                  |                          |          | <b>109.0 → 79.0</b>  | 5       |
| PCB 28           | Pollutant                | 9.04     | <b>258.0 → 186.0</b> | 25      |
|                  |                          |          | 256.0 → 186.0        | 25      |
|                  |                          |          | 186.0 → 151.0        | 25      |

| Name                                                | Pesticide classification | RT [min] | dMRM Transitions     | CE [eV] |
|-----------------------------------------------------|--------------------------|----------|----------------------|---------|
| PCB 52                                              | Pollutant                | 9.61     | 291.9 → 221.9        | 25      |
|                                                     |                          |          | <b>289.9 → 219.9</b> | 25      |
|                                                     |                          |          | 255.0 → 220.0        | 10      |
| PCB 101                                             | Pollutant                | 11.12    | 325.9 → 255.9        | 35      |
|                                                     |                          |          | 325.9 → 253.9        | 30      |
|                                                     |                          |          | <b>253.9 → 184.0</b> | 30      |
| PCB 138                                             | Pollutant                | 13.12    | <b>361.9 → 289.9</b> | 30      |
|                                                     |                          |          | 359.9 → 289.9        | 30      |
|                                                     |                          |          | 287.9 → 217.9        | 40      |
| PCB 153                                             | Pollutant                | 12.62    | 361.9 → 289.9        | 25      |
|                                                     |                          |          | <b>359.9 → 289.9</b> | 25      |
|                                                     |                          |          | 287.9 → 217.9        | 40      |
| PCB 180                                             | Pollutant                | 14.30    | 395.8 → 325.8        | 30      |
|                                                     |                          |          | 393.8 → 358.8        | 15      |
|                                                     |                          |          | <b>393.8 → 323.8</b> | 30      |
| Penconazole                                         | Fungicide                | 10.54    | 250.0 → 194.1        | 15      |
|                                                     |                          |          | <b>250.0 → 157.1</b> | 25      |
|                                                     |                          |          | 159.0 → 123.0        | 20      |
| Pendimethalin                                       | Herbicide                | 10.52    | <b>251.8 → 162.2</b> | 10      |
|                                                     |                          |          | 251.8 → 146.1        | 20      |
|                                                     |                          |          | 161.9 → 147.0        | 10      |
| Pentachloro-nitrobenzene                            | Fungicide, Nematicide    | 8.20     | 294.8 → 236.8        | 15      |
|                                                     |                          |          | 248.8 → 213.8        | 15      |
|                                                     |                          |          | <b>141.9 → 106.9</b> | 30      |
| Permethrin<br>( <i>cis</i> and <i>trans</i> isomer) | Insecticide              | 15.51    | 165.0 → 127.0        | 0       |
|                                                     |                          | 15.63    | <b>162.9 → 127.0</b> | 0       |
|                                                     |                          |          | 162.9 → 91.0         | 10      |

| Name                  | Pesticide classification | RT [min] | dMRM Transitions     | CE [eV] |
|-----------------------|--------------------------|----------|----------------------|---------|
| Phenmedipham          | Herbicide                | 7.08     | <b>167.0 → 135.0</b> | 15      |
|                       |                          |          | 167.0 → 122.0        | 15      |
|                       |                          |          | 122.0 → 94.0         | 15      |
| Phosmet               | Insecticide              | 13.90    | 301.0 → 191.8        | 10      |
|                       |                          |          | 172.9 → 104.0        | 15      |
|                       |                          |          | <b>160.0 → 133.0</b> | 15      |
| Phosmet-oxon          | Metabolite               | 13.00    | <b>301.0 → 191.8</b> | 10      |
|                       |                          |          | 172.9 → 104.0        | 15      |
|                       |                          |          | 160.0 → 133.0        | 15      |
| Picloram-methyl ester | Herbicide                | 9.55     | <b>198.0 → 163.1</b> | 15      |
|                       |                          |          | 198.0 → 161.0        | 15      |
|                       |                          |          | 196.0 → 181.0        | 15      |
| Picolinafen           | Herbicide                | 13.87    | 376.0 → 239.1        | 10      |
|                       |                          |          | <b>376.0 → 238.1</b> | 20      |
|                       |                          |          | 238.1 → 145.1        | 25      |
| Picoxystrobin         | Fungicide                | 11.29    | <b>334.9 → 172.9</b> | 10      |
|                       |                          |          | 302.8 → 156.9        | 15      |
|                       |                          |          | 145.0 → 102.1        | 25      |
| Pirimicarb            | Insecticide              | 8.73     | <b>238.0 → 166.2</b> | 10      |
|                       |                          |          | 166.0 → 71.1         | 25      |
|                       |                          |          | 166.0 → 55.1         | 10      |
| Pirimiphos-methyl     | Insecticide              | 9.58     | 290.0 → 125.0        | 20      |
|                       |                          |          | <b>232.9 → 151.0</b> | 5       |
|                       |                          |          | 232.9 → 125.0        | 5       |
| Prochloraz            | Fungicide                | 15.91    | 310.0 → 69.8         | 15      |
|                       |                          |          | <b>266.0 → 69.9</b>  | 10      |
|                       |                          |          | 180.0 → 68.9         | 15      |

| Name                      | Pesticide classification | RT [min]       | dMRM Transitions     | CE [eV] |
|---------------------------|--------------------------|----------------|----------------------|---------|
| Propamocarb               | Fungicide                | 5.39           | 188.0 → 58.0         | 10      |
|                           |                          |                | <b>143.0 → 99.1</b>  | 10      |
|                           |                          |                | 129.1 → 84.1         | 5       |
| Propaquizafop             | Herbicide                | 19.92          | 298.8 → 254.8        | 25      |
|                           |                          |                | <b>162.9 → 135.8</b> | 10      |
|                           |                          |                | 162.9 → 99.9         | 20      |
| Propiconazole (2 isomers) | Fungicide                | 12.89<br>13.00 | 258.8 → 172.9        | 15      |
|                           |                          |                | 172.9 → 109.0        | 30      |
|                           |                          |                | <b>172.9 → 74.0</b>  | 45      |
| Propyzamide               | Herbicide                | 8.06           | 173.0 → 145.0        | 25      |
|                           |                          |                | 173.0 → 109.0        | 25      |
|                           |                          |                | <b>173.0 → 74.0</b>  | 25      |
| Prosulfocarb              | Herbicide                | 9.37           | 251.0 → 218.3        | 10      |
|                           |                          |                | <b>251.0 → 128.2</b> | 5       |
|                           |                          |                | 251.0 → 100.1        | 5       |
| Prothioconazole-desthio   | Fungicide                | 11.91          | <b>186.0 → 89.0</b>  | 10      |
|                           |                          |                | 186.0 → 70.0         | 10      |
|                           |                          |                | 125.0 → 99.0         | 20      |
| Pymetrozine               | Insecticide              | 11.51          | <b>132.0 → 105.0</b> | 10      |
|                           |                          |                | 132.0 → 78.0         | 20      |
|                           |                          |                | 113.0 → 98.0         | 5       |
| Pyraclostrobin            | Fungicide                | 17.46          | <b>324.8 → 131.7</b> | 15      |
|                           |                          |                | 164.0 → 132.1        | 10      |
|                           |                          |                | 110.8 → 75.0         | 15      |
| Pyraflufen-ethyl          | Herbicide                | 13.03          | 412.0 → 349.0        | 10      |
|                           |                          |                | 349.0 → 307.0        | 15      |
|                           |                          |                | <b>338.9 → 288.9</b> | 15      |

| Name                    | Pesticide classification | RT [min] | dMRM Transitions     | CE [eV] |
|-------------------------|--------------------------|----------|----------------------|---------|
| Pyridaben               | Insecticide              | 15.77    | <b>309.0 → 147.1</b> | 15      |
|                         |                          |          | 147.2 → 132.2        | 10      |
|                         |                          |          | 147.2 → 117.1        | 20      |
| Pyridalyl               | Insecticide              | 16.73    | 204.0 → 148.0        | 25      |
|                         |                          |          | 164.0 → 146.0        | 15      |
|                         |                          |          | <b>146.0 → 126.0</b> | 10      |
| Pyrimethanil            | Fungicide                | 8.24     | 198.0 → 183.1        | 15      |
|                         |                          |          | 198.0 → 158.1        | 20      |
|                         |                          |          | <b>198.0 → 118.1</b> | 35      |
| Pyriproxyfen            | Insecticide              | 14.61    | <b>321.0 → 222.0</b> | 10      |
|                         |                          |          | 321.0 → 153.0        | 25      |
|                         |                          |          | 136.1 → 96.0         | 15      |
| Quinoclamine            | Herbicide                | 9.76     | 209.0 → 172.1        | 10      |
|                         |                          |          | 207.0 → 172.1        | 20      |
|                         |                          |          | <b>172.0 → 89.0</b>  | 20      |
| Quinoxifen              | Fungicide                | 12.85    | 306.8 → 237.0        | 20      |
|                         |                          |          | 271.9 → 237.1        | 10      |
|                         |                          |          | <b>237.0 → 208.0</b> | 30      |
| Spirodiclofen           | Insecticide              | 15.56    | 312.1 → 259.0        | 10      |
|                         |                          |          | <b>312.1 → 108.9</b> | 15      |
|                         |                          |          | 157.0 → 73.0         | 25      |
| Spiromesifen            | Insecticide              | 13.71    | 272.0 → 209.2        | 10      |
|                         |                          |          | <b>253.8 → 185.1</b> | 15      |
|                         |                          |          | 231.0 → 157.1        | 15      |
| Spiroxamine (2 Isomers) | Fungicide                | 9.08     | <b>198 → 126.1</b>   | 5       |
|                         |                          | 9.53     | 126.0 → 84.0         | 5       |
|                         |                          |          | 100.0 → 58.0         | 10      |

| Name                    | Pesticide classification | RT [min] | dMRM Transitions     | CE [eV] |
|-------------------------|--------------------------|----------|----------------------|---------|
| Tebuconazole            | Fungicide                | 13.22    | <b>250.0 → 125.0</b> | 20      |
|                         |                          |          | 125.0 → 99.0         | 20      |
|                         |                          |          | 125.0 → 89.0         | 15      |
| Tebufenpyrad            | Insecticide              | 14.09    | 332.9 → 171.0        | 15      |
|                         |                          |          | 318.0 → 131.0        | 15      |
|                         |                          |          | <b>275.9 → 171.1</b> | 10      |
| Tefluthrin              | Insecticide              | 8.41     | 199.0 → 161.1        | 5       |
|                         |                          |          | <b>197.0 → 161.1</b> | 5       |
|                         |                          |          | 177.1 → 127.1        | 15      |
| Terbuthylazine          | Herbicide, Microbiocide  | 8.12     | 228.9 → 138.0        | 15      |
|                         |                          |          | 214.0 → 104.0        | 20      |
|                         |                          |          | <b>214.0 → 71.0</b>  | 5       |
| Terbuthylazine-desethyl | Herbicide, Microbiocide  | 7.36     | 186.2 → 104.0        | 15      |
|                         |                          |          | <b>186.2 → 83.1</b>  | 20      |
|                         |                          |          | 145.1 → 68.1         | 10      |
| Tetraconazole           | Fungicide                | 9.99     | 336.0 → 217.9        | 20      |
|                         |                          |          | <b>336.0 → 203.8</b> | 30      |
|                         |                          |          | 170.9 → 136.0        | 10      |
| Thiabendazole           | Fungicide                | 10.73    | <b>201.9 → 175.0</b> | 15      |
|                         |                          |          | 201.0 → 130.0        | 30      |
|                         |                          |          | 173.9 → 65.0         | 30      |
| Thiacloprid             | Insecticide              | 17.20    | 126.0 → 99.1         | 10      |
|                         |                          |          | 126.0 → 90.1         | 5       |
|                         |                          |          | <b>126.0 → 73.0</b>  | 20      |
| Tolclofos-methyl        | Fungicide                | 9.14     | <b>267.0 → 252.0</b> | 15      |
|                         |                          |          | 267.0 → 93.0         | 30      |
|                         |                          |          | 267.0 → 63.0         | 45      |

| Name                   | Pesticide classification | RT [min] | dMRM Transitions     | CE [eV] |
|------------------------|--------------------------|----------|----------------------|---------|
| Tralkoxydim            | Herbicide                | 14.75    | 282.1 → 226.0        | 10      |
|                        |                          |          | 268.2 → 143.0        | 40      |
|                        |                          |          | <b>226.0 → 143.0</b> | 25      |
| Triadimenol            | Fungicide                | 10.73    | <b>129.9 → 102.0</b> | 15      |
|                        |                          |          | 129.9 → 65.0         | 25      |
|                        |                          |          | 112.0 → 58.0         | 10      |
| Triallate              | Herbicide                | 8.57     | <b>270.0 → 228.1</b> | 10      |
|                        |                          |          | 268.0 → 226.1        | 10      |
|                        |                          |          | 268.0 → 184.1        | 20      |
| Triclopyr-methyl ester | Herbicide                | 7.51     | <b>209.9 → 145.9</b> | 20      |
|                        |                          |          | 209.9 → 109.9        | 35      |
|                        |                          |          | 145.9 → 110.0        | 15      |
| Trifloxystrobin        | Fungicide                | 12.94    | 186.0 → 145.1        | 15      |
|                        |                          |          | 172.0 → 145.1        | 15      |
|                        |                          |          | <b>172.0 → 95.0</b>  | 30      |
| Triflumizole           | Fungicide                | 10.81    | 345.0 → 302.0        | 10      |
|                        |                          |          | 239.1 → 66.9         | 40      |
|                        |                          |          | <b>132.0 → 90.0</b>  | 35      |
| Trinexapac-ethyl       | Herbicide                | 9.50     | <b>224.0 → 151.0</b> | 5       |
|                        |                          |          | 224.0 → 95.0         | 25      |
|                        |                          |          | 207.0 → 68.9         | 25      |
| Triticonazole          | Fungicide                | 14.51    | 237.0 → 182.0        | 10      |
|                        |                          |          | 237.0 → 167.1        | 25      |
|                        |                          |          | <b>234.8 → 182.1</b> | 10      |
| Warfarin               | Rodenticide              | 15.44    | 308.0 → 187.0        | 20      |
|                        |                          |          | 265.0 → 187.0        | 5       |
|                        |                          |          | <b>265.0 → 121.0</b> | 15      |

| Name     | Pesticide classification | RT [min] | dMRM Transitions     | CE [eV] |
|----------|--------------------------|----------|----------------------|---------|
| Zoxamide | Fungicide                | 13.47    | 259.9 → 189.0        | 10      |
|          |                          |          | <b>257.9 → 187.1</b> | 10      |
|          |                          |          | 189.0 → 161.1        | 15      |

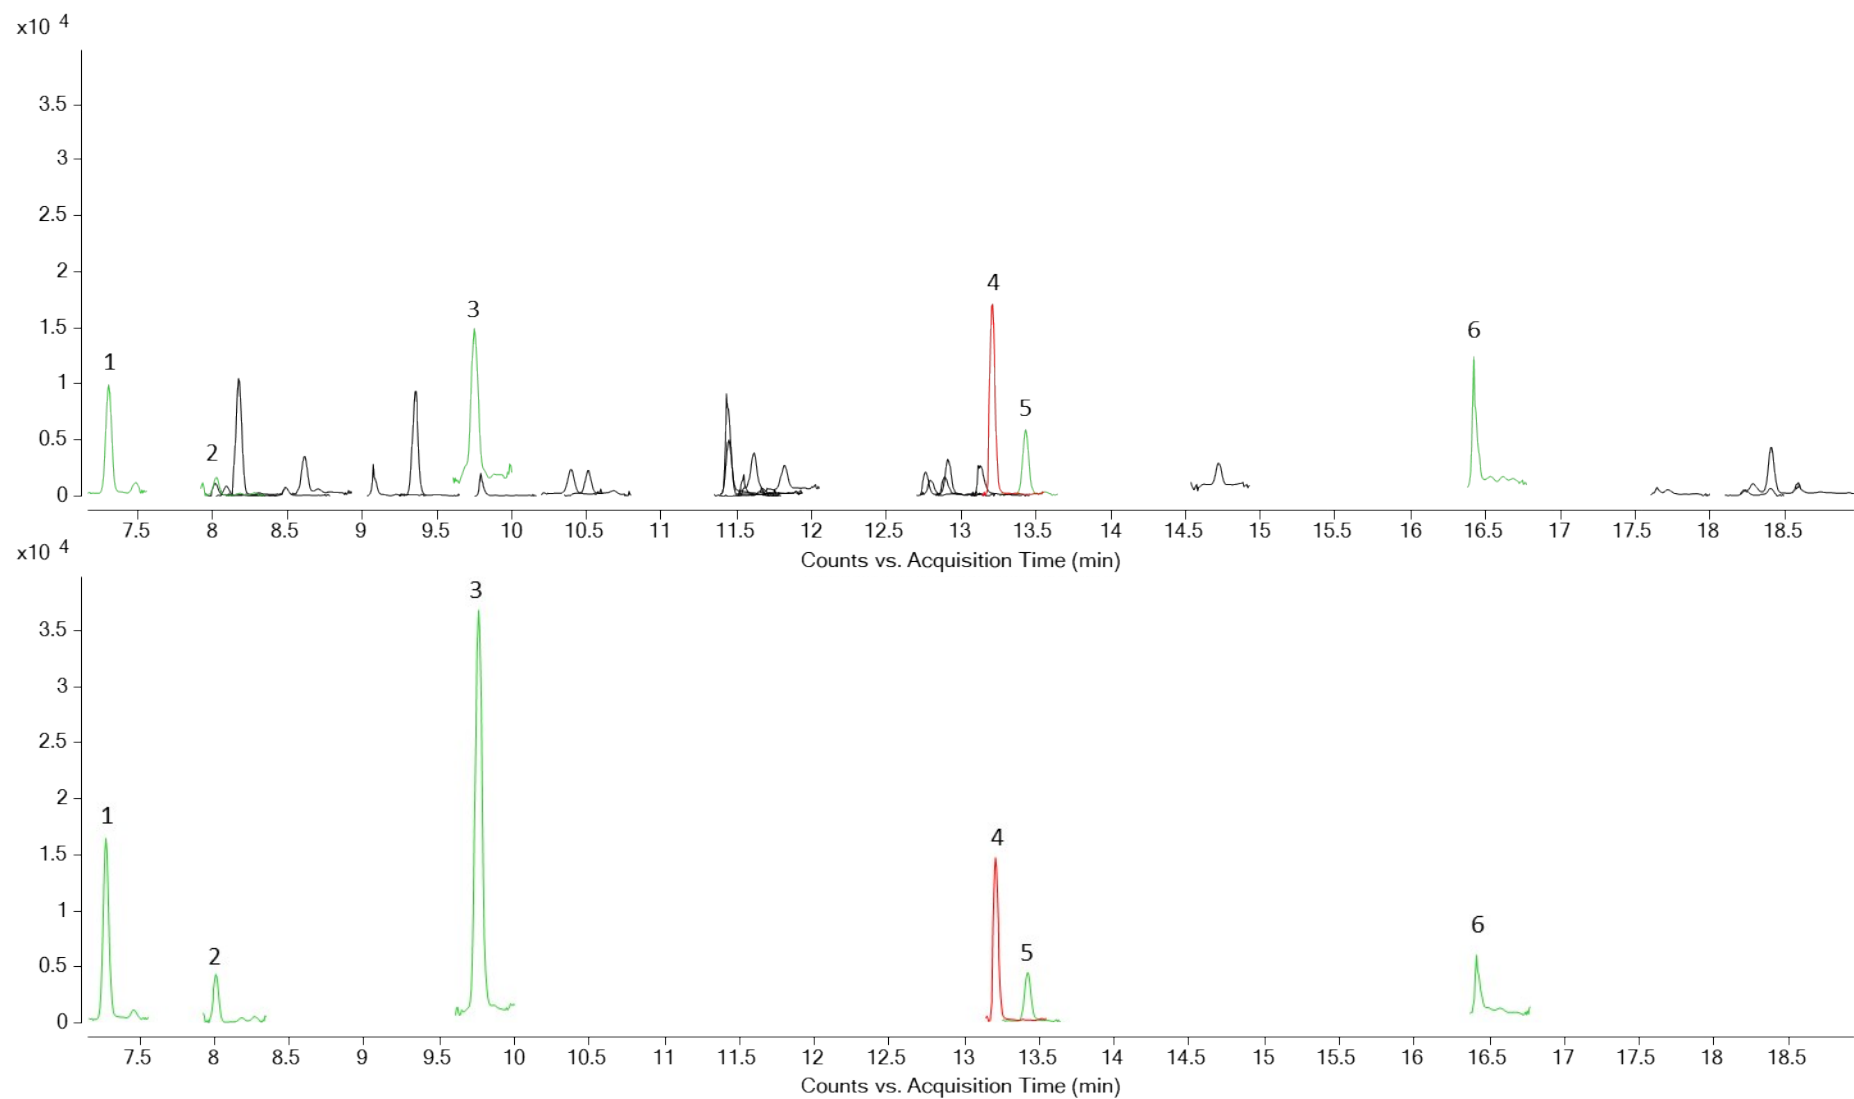

**Supplementary Figure 1.** Chromatograms of a matrix matched calibration standard (LOQ concentration, top) and the beech sample from Belauer See, 2011 (bottom). 1 = Terbuthylazine-desethyl, 2 = terbuthylazine, 3 = fenpropimorph, 4 = triphenyl phosphate (ISTD), 5 = epoxiconazole, 6 = boscalid.
